# Supplementary figures and images for: Compilation of 10 Years of MIRU-VNTR Data: Canadian National Tuberculosis Laboratory’s Experience
Source: Hindawi journal article supplement (doi:10.1155/2022/3505142), 2022-08-22

**Figure S1: Three largest clusters in Alberta**

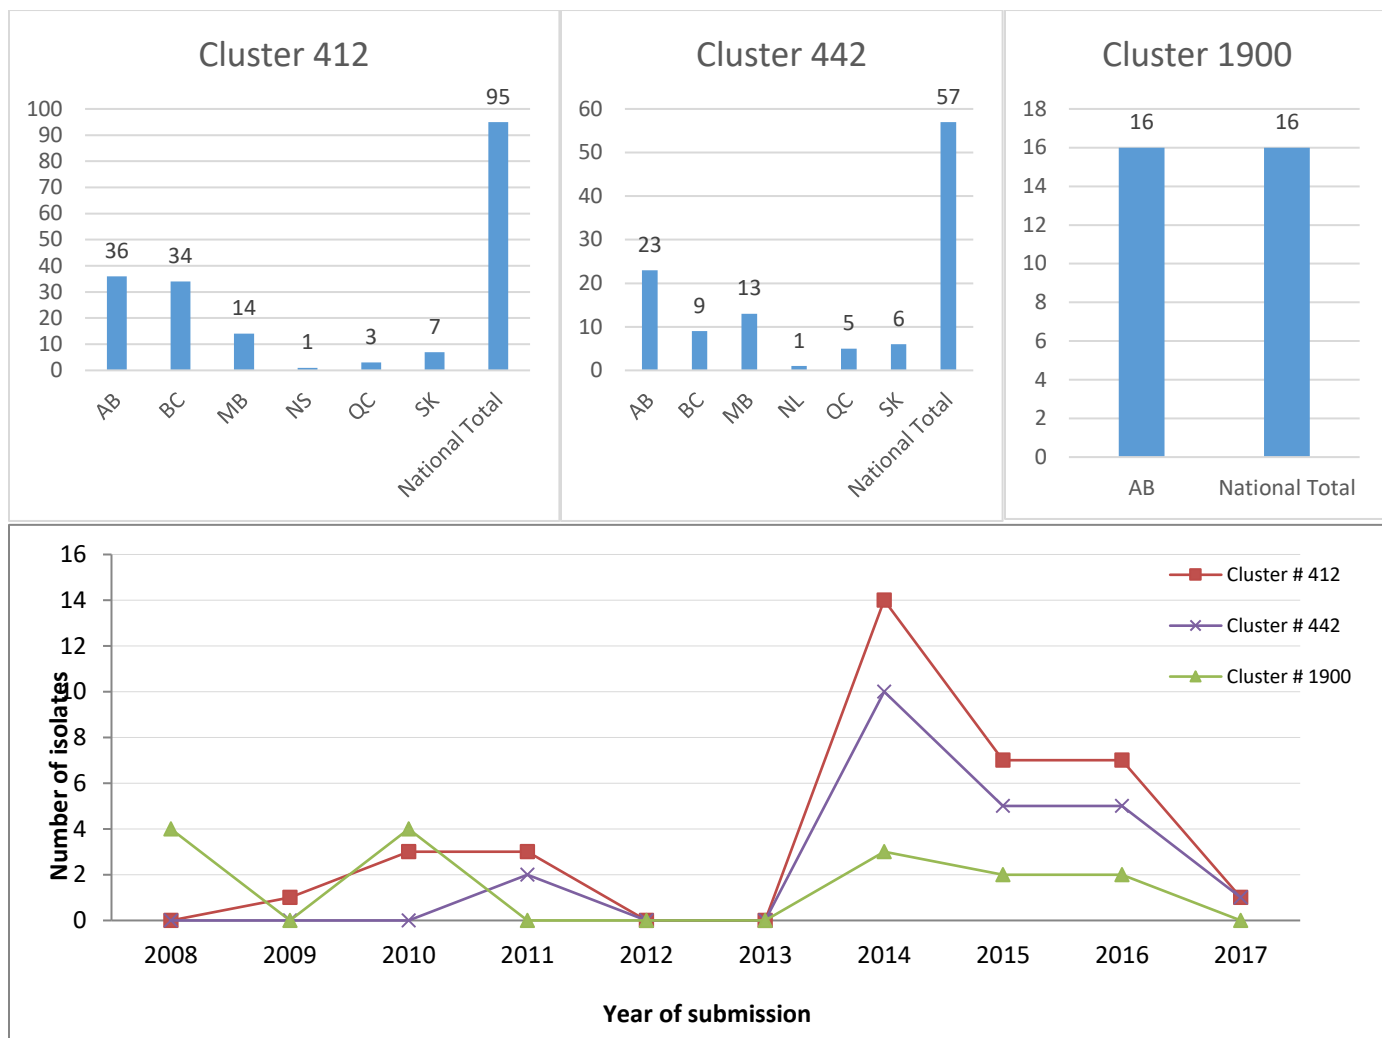

Supplement: f1 [file 3505142.f1.zip]

**Figure S4: Three largest clusters in Manitoba**

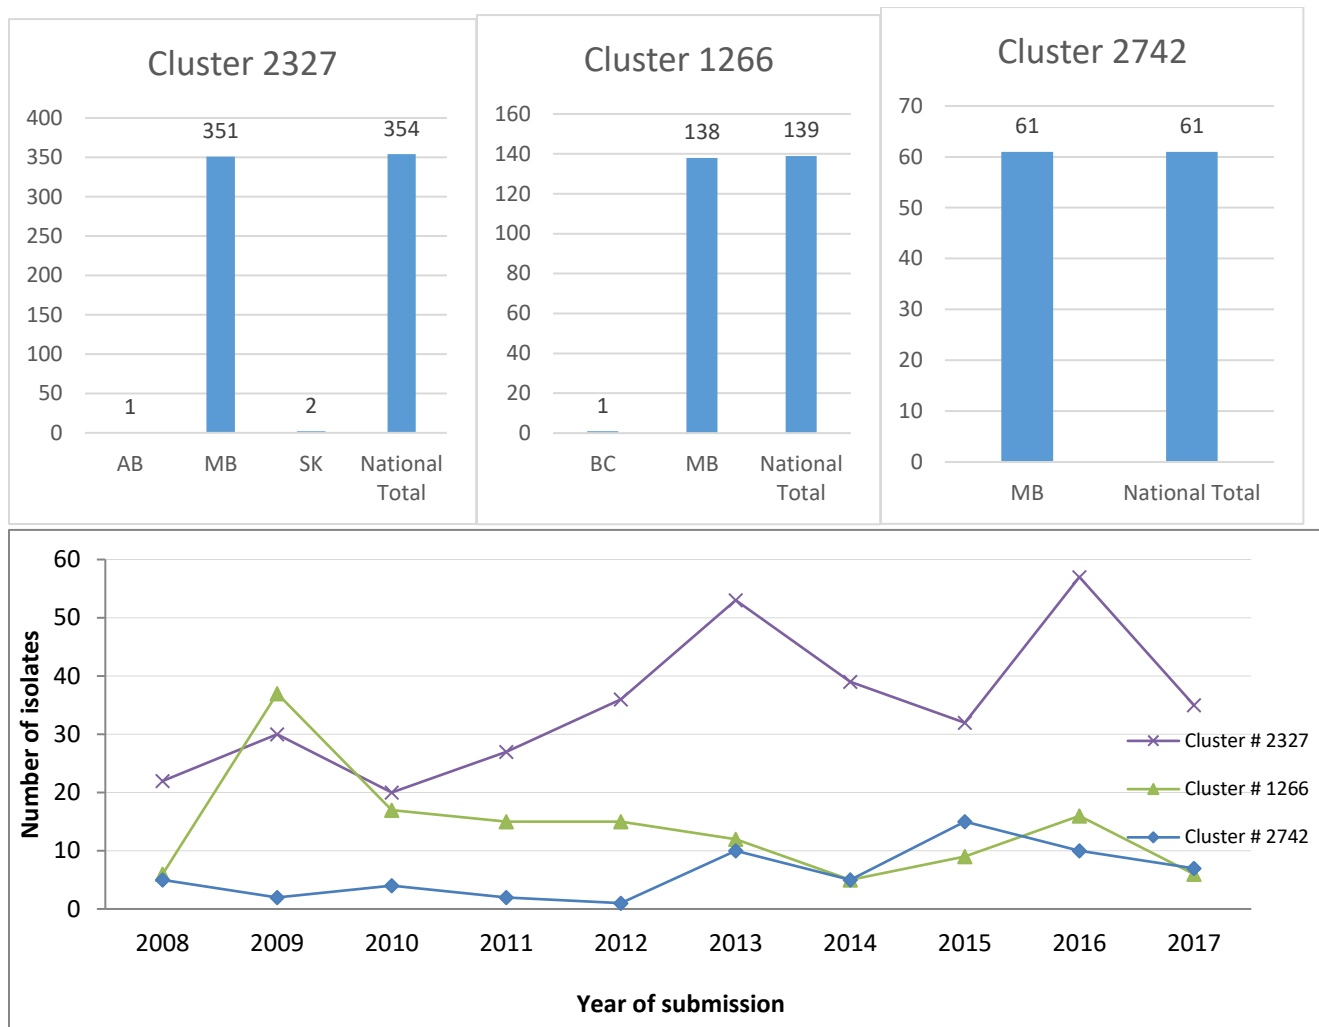

Supplement: f1 [file 3505142.f1.zip]

**Figure S5: Three largest clusters in Quebec**

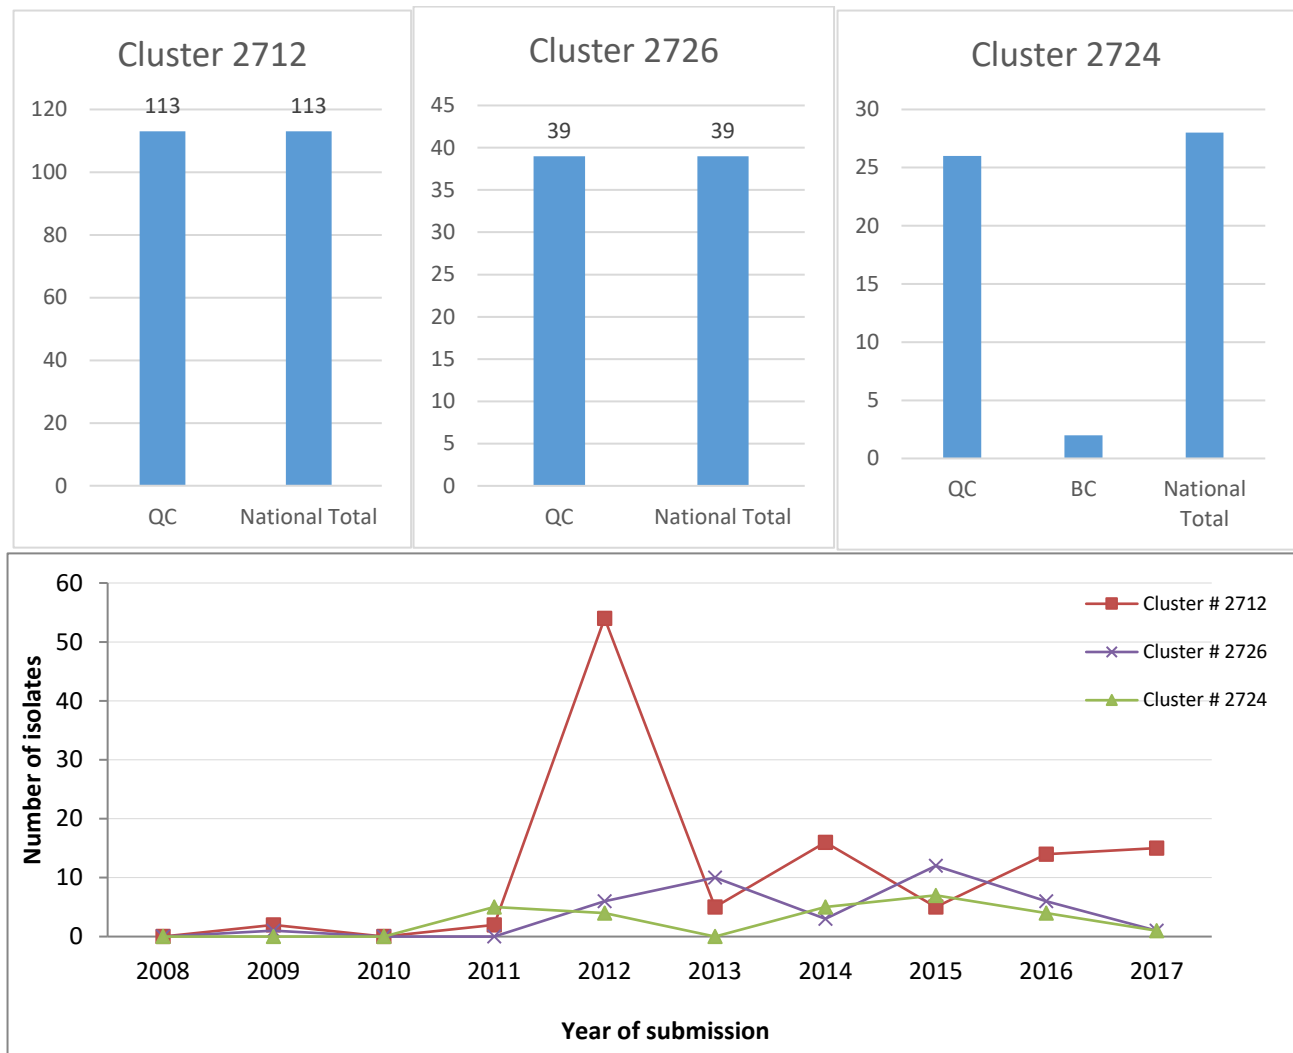

Supplement: f1 [file 3505142.f1.zip]

**Figure S2: Three largest clusters in BC**

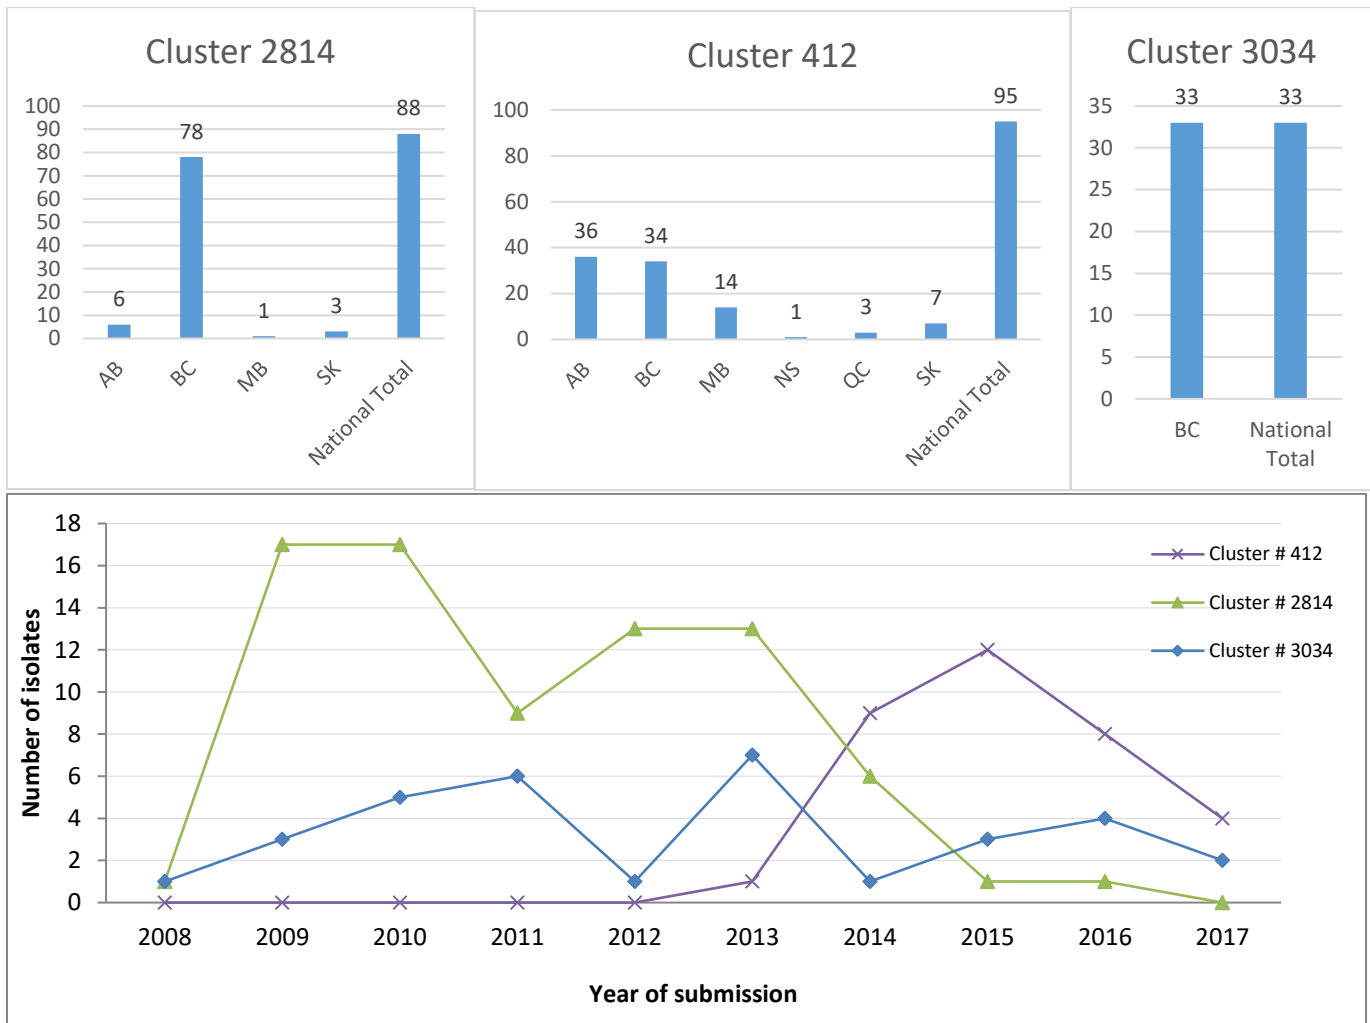

Supplement: f1 [file 3505142.f1.zip]

Figure S7

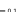

Supplement: f1 [file 3505142.f1.zip]

**Figure S6: Three largest clusters in Atlantic provinces**

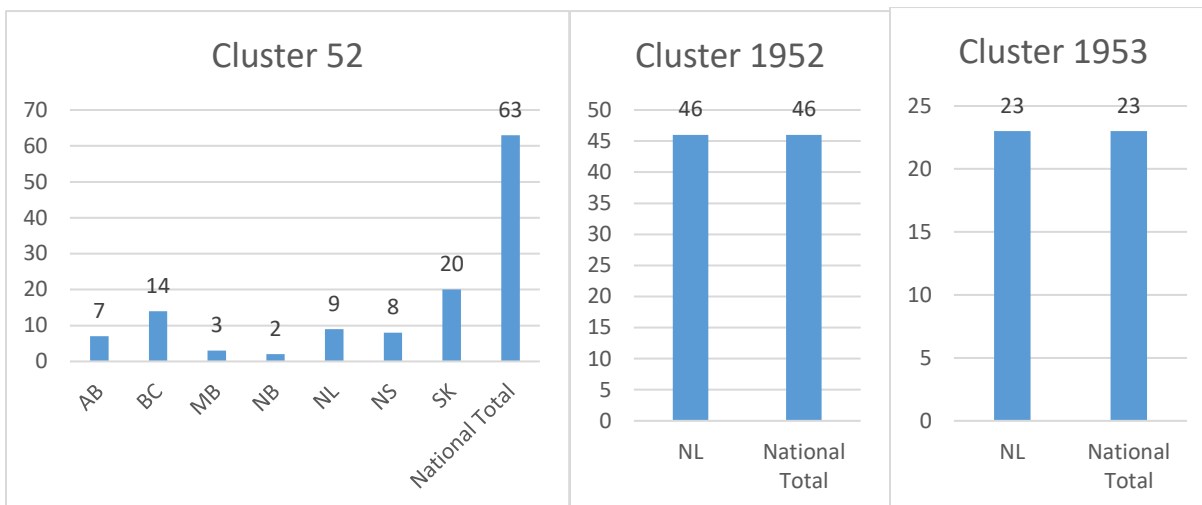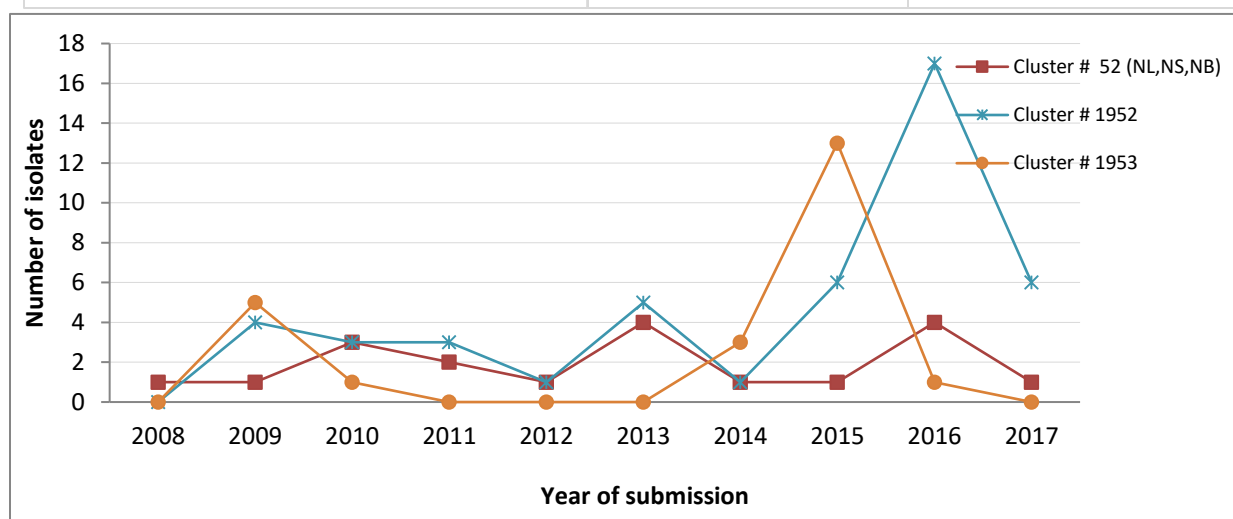

Supplement: f1 [file 3505142.f1.zip]

**Figure S3: Three largest clusters in Saskatchewan**

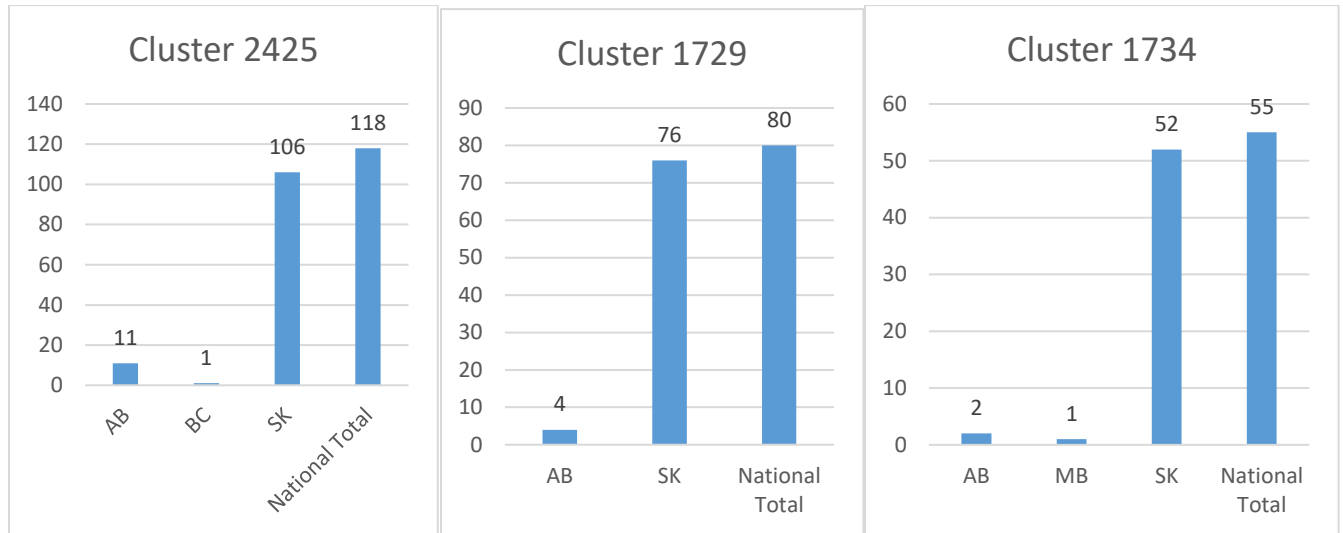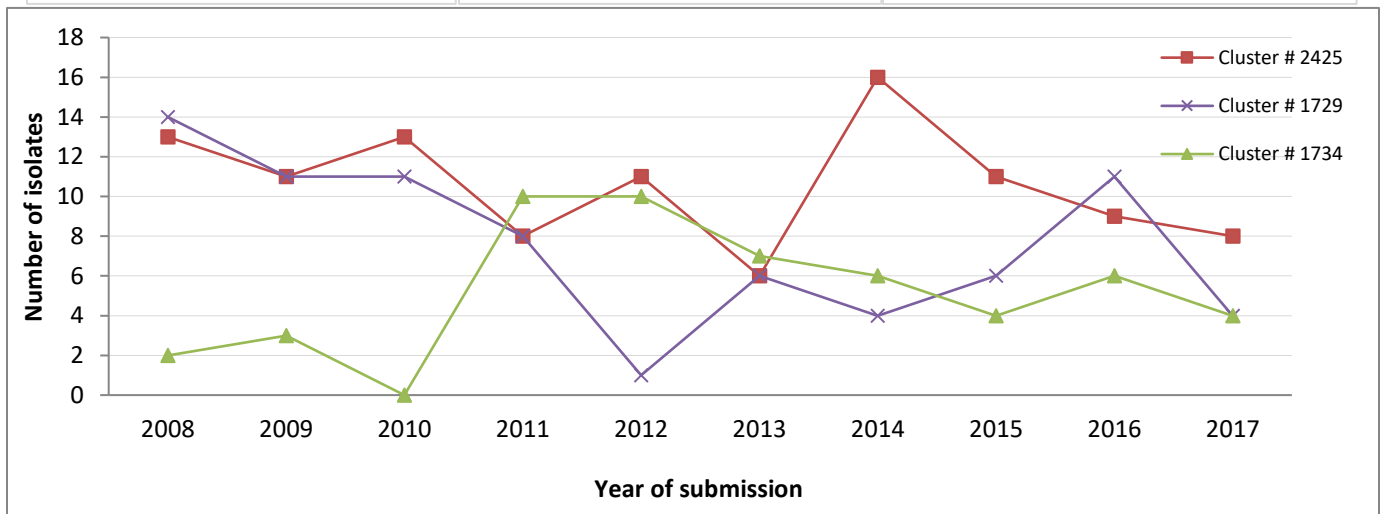

Supplement: f1 [file 3505142.f1.zip]
